# Supplementary material
Source: PubMed Central journal article supplement (PMC6237218)
Supplement: jciinsight-3-122299-s224.pdf [file jciinsight-3-122299-s224.pdf]

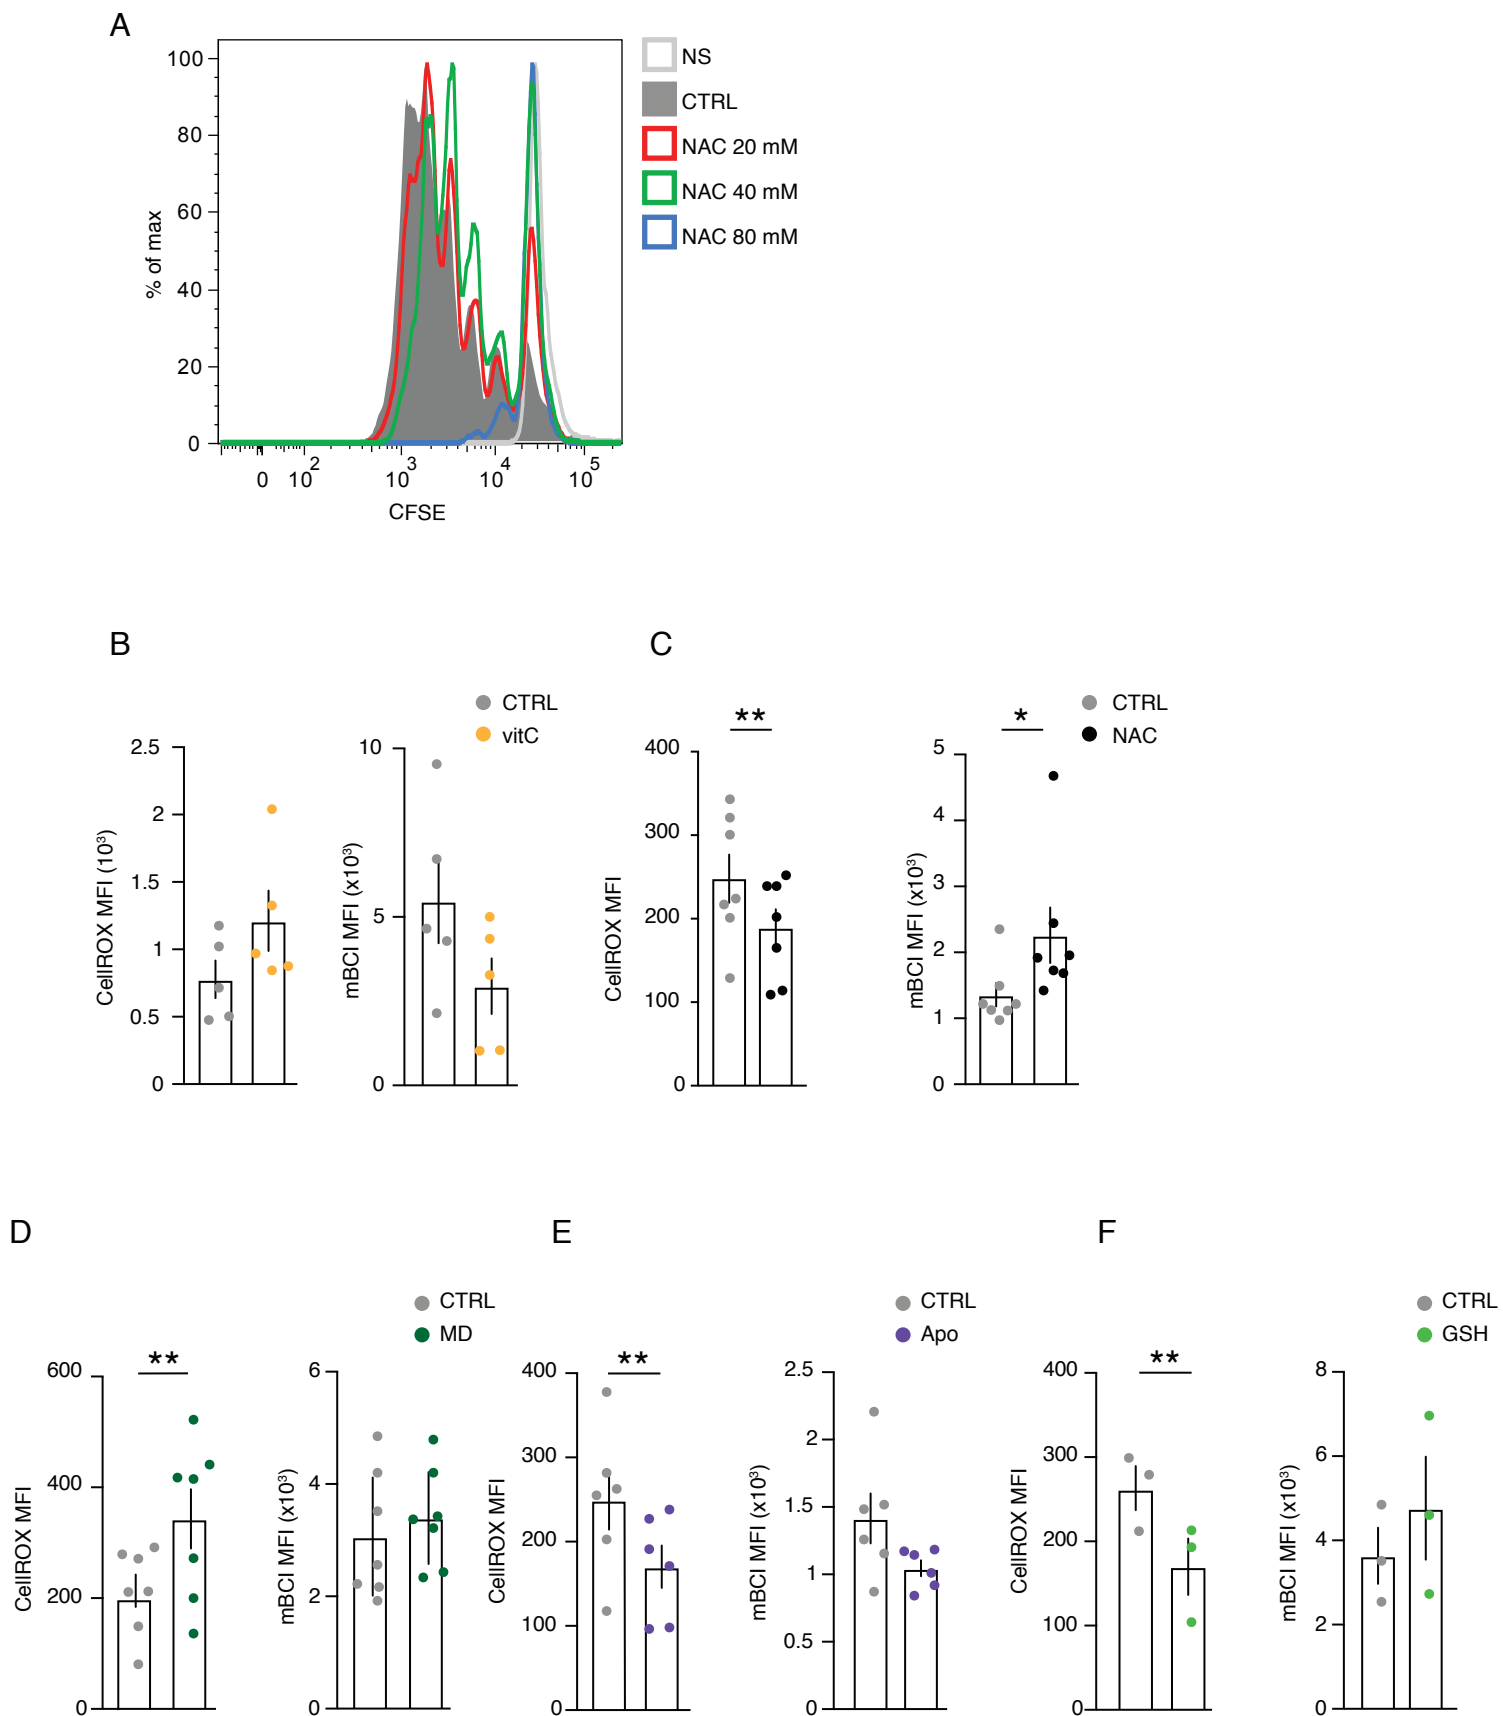

Supplementary Figure 1

**Supplementary Figure 1. Total cellular reactive oxygen species (ROS) and reduced glutathione (GSH) levels in CD8<sup>+</sup> T cells activated in the absence or presence of different modulators of redox status. A)** Representative histogram of CFSE dilution of NAC-treated and CTRL CD8<sup>+</sup> T cells evaluated at day 4. Different concentrations of NAC were tested. NS, CFSE-stained, non-proliferating control cells. Similar results were obtained from n=2 HD in n=1 exp. **B-F)** Mean±SEM MFI of CellROX and mBCI in CD8<sup>+</sup> T<sub>N</sub> cells (n=3-7 HD) activated for different times with anti-CD3/CD28 Dynabeads and IL-2/IL-12 in the absence or presence of vitC (B; 48h), NAC (C; 18h), MD (D; 2h), Apo (E; 18h), GSH (F; 2h). Selected time points of a time course experiments involving measurements at 2, 18 and 48h after stimulation are shown for simplicity. Statistical analyses were performed with paired Student's t-test in all graphs except of mBCI staining of NAC where non-parametric Wilcoxon test was used. \* p<0.05, \*\* p<0.01.

A

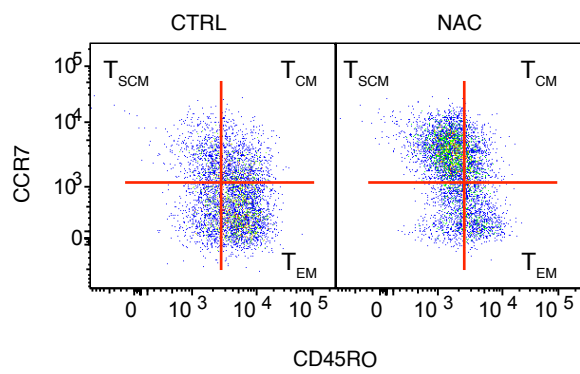

B

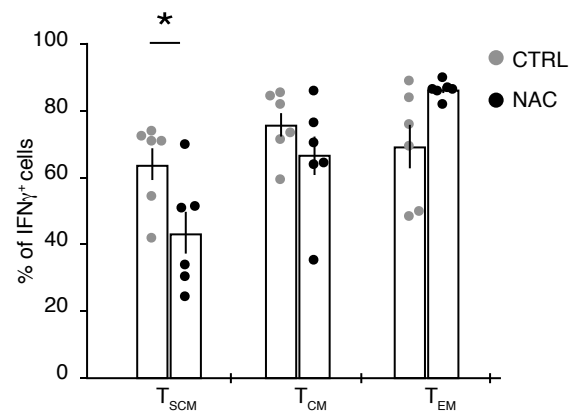

C

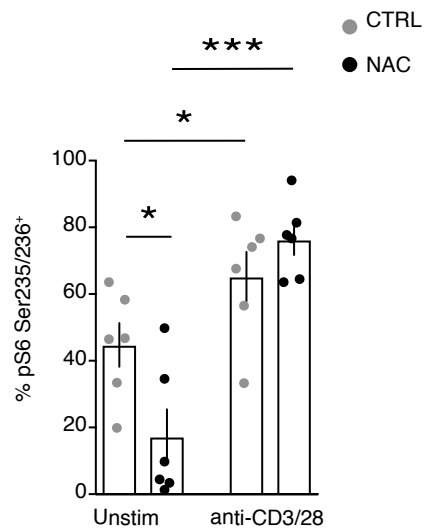

D

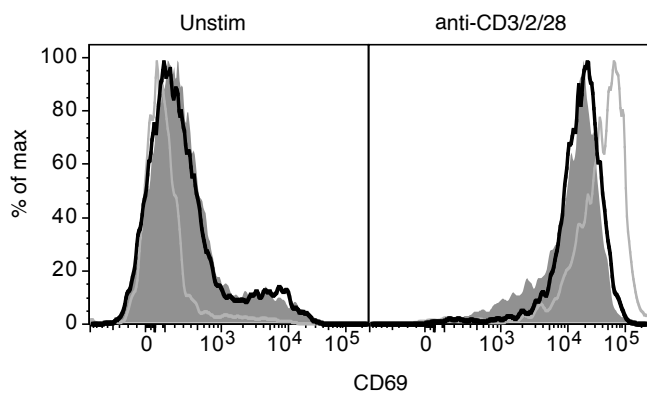

E

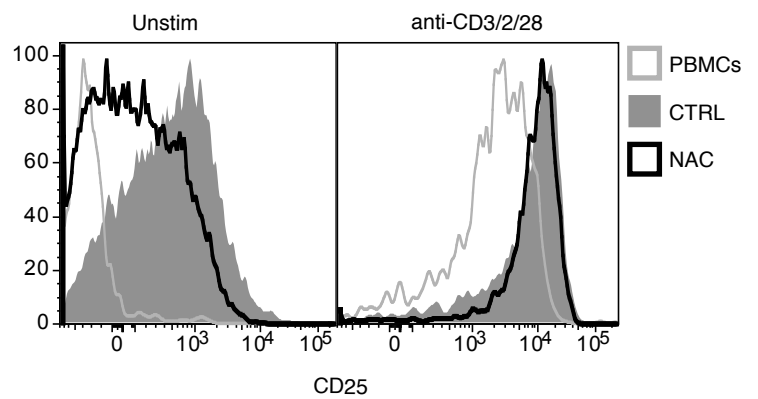

**Supplementary Figure 2. NAC-generated T<sub>SCM</sub> cells undergo rapid activation**

**following restimulation. A)** Representative CD45RO and CCR7 expression in CD8<sup>+</sup> T cells treated as in Figure 2E and restimulated with PMA/ionomycin. **B)** Mean±SEM frequencies of IFN $\gamma$ <sup>+</sup> cells with the indicated maturation phenotypes from CTRL and NAC-treated CD8<sup>+</sup> T cells (n=6 HD from n=2 exp.). \* p<0.05, non-parametric paired Wilcoxon test. **C)** Mean±SEM frequencies of Ser235/236 pS6<sup>+</sup> in CTRL and NAC-generated CD8<sup>+</sup> T<sub>SCM</sub> cells at day 8 left unstimulated (unstim) or restimulated with anti-CD3/28 for 30 minutes (n=6 HD from n=2 exp.). \* p<0.05, \*\*\* p<0.001, parametric paired Student's t-test. **D, E)** Representative histograms of CD69 (D) and CD25 (E) in CTRL and NAC-generated CD8<sup>+</sup> T<sub>SCM</sub> cells at day 8 left unstimulated (unstim) or restimulated with anti-CD3/2/28 antibody-conjugated beads. PBMCs from a HD are depicted as an additional control. Similar results were obtained from n=2 additional individuals from n=2 exp.
