# Supplementary material
Source: PubMed Central journal article supplement (PMC6237218)
Supplement: jciinsight-3-122299-s226.pdf [file jciinsight-3-122299-s226.pdf]

**Supplementary Table 2. List of antibodies used for flow cytometry**

| <b>name</b>             | <b>clone</b> | <b>fluorochrome</b> | <b>company</b> | <b>cat#</b>   |
|-------------------------|--------------|---------------------|----------------|---------------|
| anti-hCCR7              | 150503       | PE-CF594            | BD             | 562381        |
| anti-hCD16              | 3G8          | PE-Cy7              | BD             | 557744        |
| anti-hCD25              | M-A251       | BV650               | BD             | 563719        |
| anti-hCD27              | O323         | APC eFluor780       | eBioscience    | 47-0279-42    |
| anti-hCD3               | OKT3         | BV650               | BioLegend      | 317324        |
| anti-hCD3               | UCHT1        | BUV496              | BD             | 564809        |
| anti-hCD366<br>(TIM-3)  | 7D3          | BV650               | BD             | 565564        |
| anti-hCD45              | H-130        | PacificBlue         | BioLegend      | 304022        |
| anti-hCD45RA            | HI-100       | BV421               | BD             | 562885        |
| anti-hCD45RA            | HI100        | BUV563              | BD             | 565702        |
| anti-hCD45RO            | UCHL1        | PerCP-Cy5.5         | BioLegend      | 304222        |
| anti-hCD45RO            | UCHL1        | BV711               | BD             | 563723        |
| anti-hCD56              | MEM-188      | PE-Cy5              | BioLegend      | 304608        |
| anti-hCD69              | FN50         | PE-Cy7              | BD             | 557745        |
| anti-hCD8               | RPA-T8       | APC                 | BD             | 555369        |
| anti-hCD8               | RPA-T8       | BV786               | BD             | 563823        |
| anti-hCD8               | RPA-T8       | BV570               | BioLegend      | 301037        |
| anti-hCD95              | DX2          | PE                  | BD             | 555674        |
| anti-hCD95              | DX2          | PE-Cy5              | BD             | 559773        |
| anti-hIFN $\gamma$      | B27          | BV711               | BD             | 564039        |
| anti-hIFN $\gamma$      | B27          | PE-Cy7              | BioLegend      | 506518        |
| anti-hIL2               | MQ1-17H12    | APC                 | BD             | 554567        |
| anti-hIL2               | 5344.111     | BV421               | BD             | 562914        |
| anti-hKi-67             | B56          | FITC                | BD             | 56026         |
| anti-hPD-1<br>(CD279)   | EH12.2H7     | PE-Cy7              | BioLegend      | 329918        |
| anti-hpS6<br>Ser235/236 | D57.2.2E     | AF647               | CellSignalling | 4851S         |
| anti-hpS6<br>Ser240/244 | D68F8        | PE                  | CellSignalling | 14236S        |
| anti-hTCF-1/7           | C63D9        | PE                  | CellSignalling | 14456S        |
| anti-hTNF $\alpha$      | mAb11        | APC-Cy7             | BioLegend      | 502944        |
| anti-mCD44              | IM7          | PerCP-Cy5.5         | eBioscience    | 45-0441-82    |
| anti-mCD44              | 53-6.7       | FITC                | eBioscience    | BMS11-0441-82 |
| anti-mCD45              | 30-F11       | PerCP-Cy5.5         | BioLegend      | 103132        |
| anti-mCD45.1            | A20          | PE                  | BioLegend      | 110708        |
| anti-mCD45.2            | 104          | APC                 | BioLegend      | 109825        |
| anti-mCD62L             | MEL-14       | APC                 | BD             | 553152        |

|                    |           |         |             |            |
|--------------------|-----------|---------|-------------|------------|
| anti-mCD62L        | MEL-14    | APC-CY7 | BioLegend   | 104428     |
| anti-mCD8          | 53-6.7    | BV570   | BioLegend   | 100740     |
| anti-mCXCR3        | CXCR3-173 | PE      | BD          | 740825     |
| anti-mIFN $\gamma$ | XMG1.2    | BV421   | BioLegend   | 5058.29    |
| anti-mSca-1        | D7        | PE-Cy7  | eBioscience | 25-5981-82 |
| anti-mTNF $\alpha$ | MP6-XT22  | AF488   | BioLegend   | 506315     |

*Abbreviations:* h - human; m - mouse; p - phospho
